# Supplementary material for: Neonatal BCG vaccination is associated with a long-term DNA methylation signature in circulating monocytes
Source: PubMed Central journal article supplement (PMC9355358; doi:10.1126/sciadv.abn4002), 2022-08-05
Supplement: sciadv.abn4002_sm.pdf [file sciadv.abn4002_sm.pdf]

Supplementary Materials for  
**Neonatal BCG vaccination is associated with a long-term DNA methylation signature in circulating monocytes**

Samantha Bannister *et al.*

Corresponding author: Boris Novakovic, [boris.novakovic@mcri.edu.au](mailto:boris.novakovic@mcri.edu.au); Nigel Curtis, [nigel.curtis@mcri.edu.au](mailto:nigel.curtis@mcri.edu.au)

*Sci. Adv.* **8**, eabn4002 (2022)  
DOI: 10.1126/sciadv.abn4002

**The PDF file includes:**

Figs. S1 to S9  
Legends for tables S1 to S8

**Other Supplementary Material for this manuscript includes the following:**

Tables S1 to S8

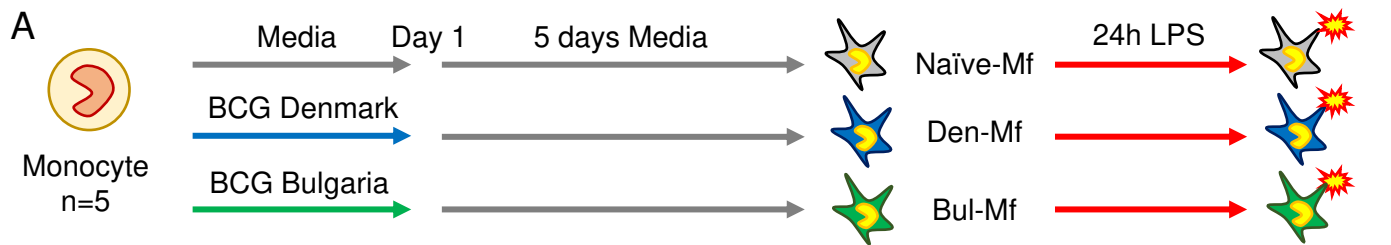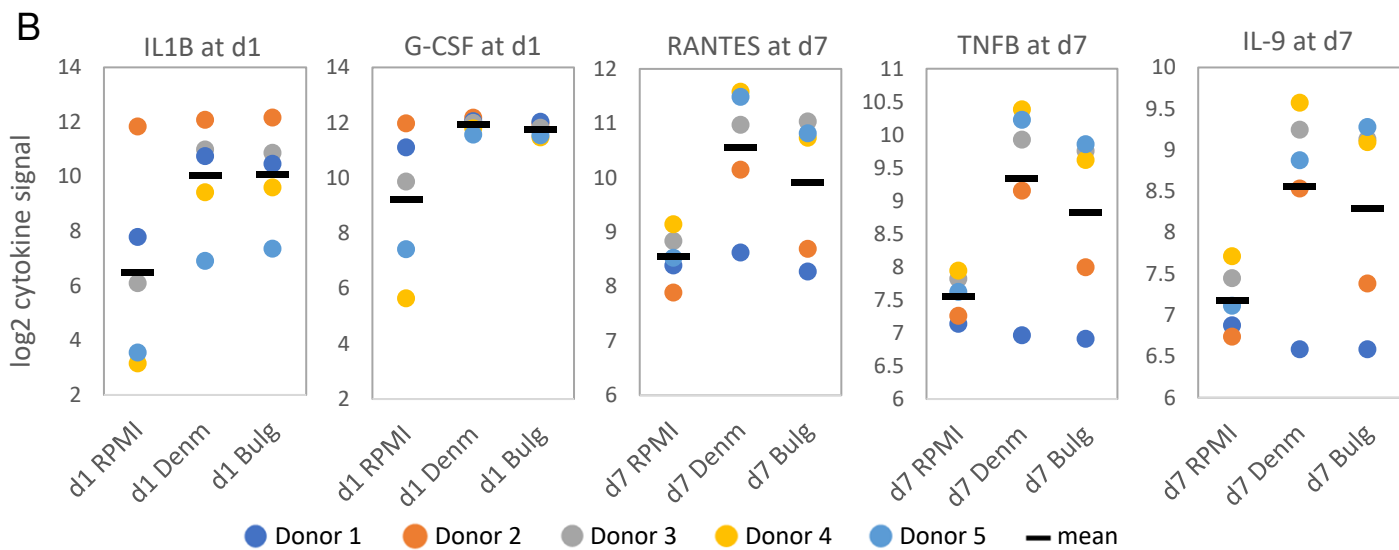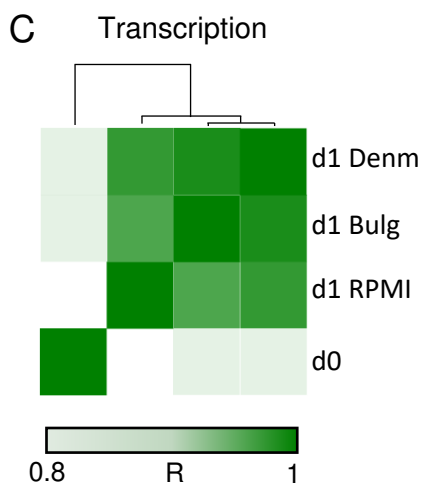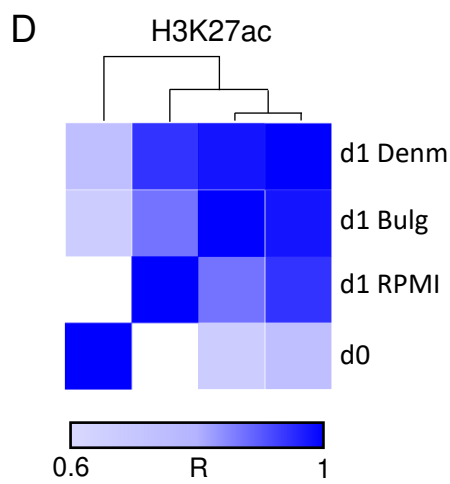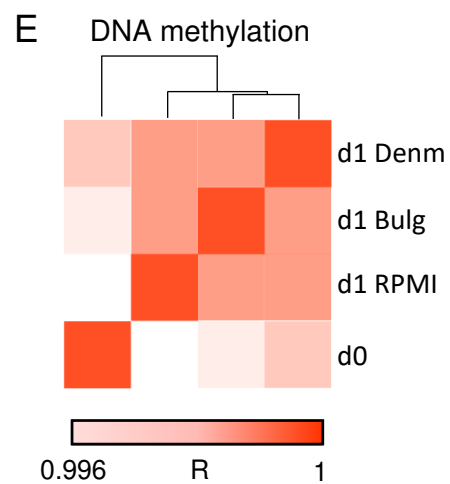

**F** Complement and GBP genes RNA expression – primed at day 6 by BCG (individual donors)

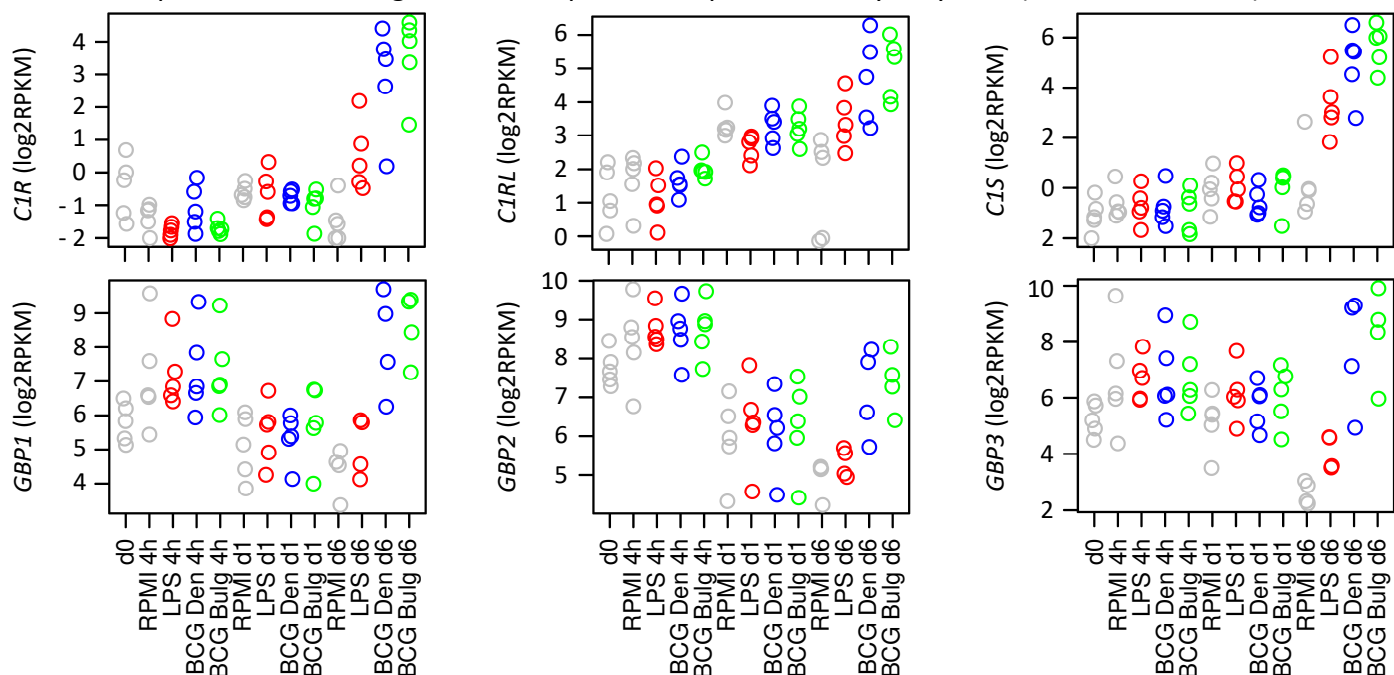

**Figure S1. Related to Figure 1. Two different strains of BCG vaccine induce similar transcriptional, epigenetic and cytokine signatures.** **A.** Experimental set-up for the *in vitro* TRIM protocol, including HKCA as a positive TRIM control, LPS as a tolerance control. **B.** Bar plot showing TNF and IL-6 release at day 6 for each donor compared to naïve-Mf control. LPS-Mf show a tolerised response relative to Naïve-Mf, while HKCA-Mf and BCG-Mf show a trained response. Correlation matrix heatmap of day 0 and day 1 samples based on BCG associated **C.** gene expression, **D.** H3K27ac and **E.** DNA methylation change. H3K27ac showed the largest variation (R 0.6 – 1), while DNA methylation showed the smallest variation (R 0.996 – 1) within the first 24 hours. **F.** Dot plots showing RNA expression for specific genes of interest in individual donors as log<sub>2</sub>RPKM values. The complement genes *C1R*, *C1RL*, *C1S*, and Guanylate-Binding Proteins, *GBPI*, -2 and -3 all show higher expression in BCG day 6 samples.

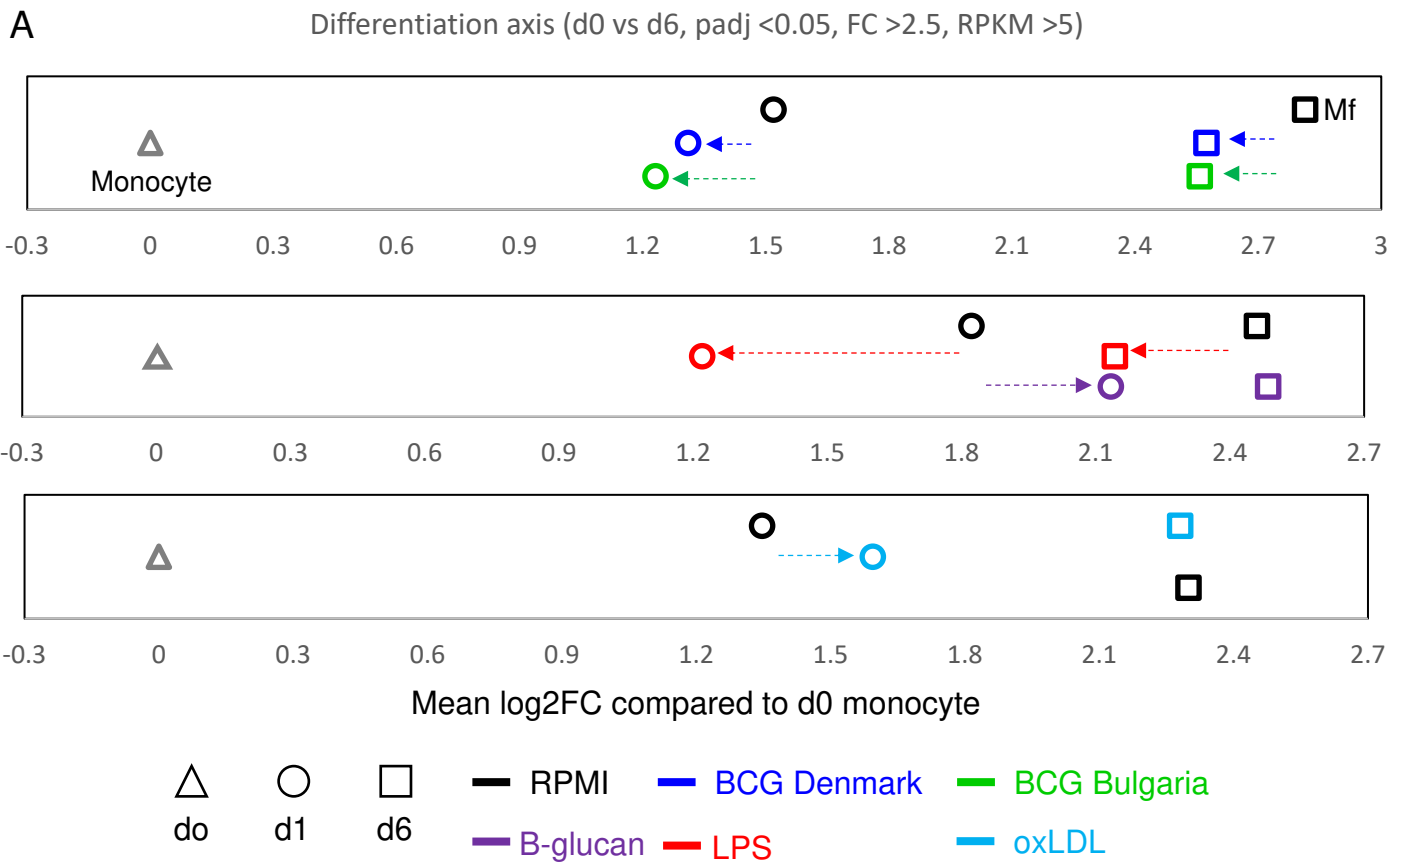

**B** LPL – differentiation associated gene induced by TRIM stimuli

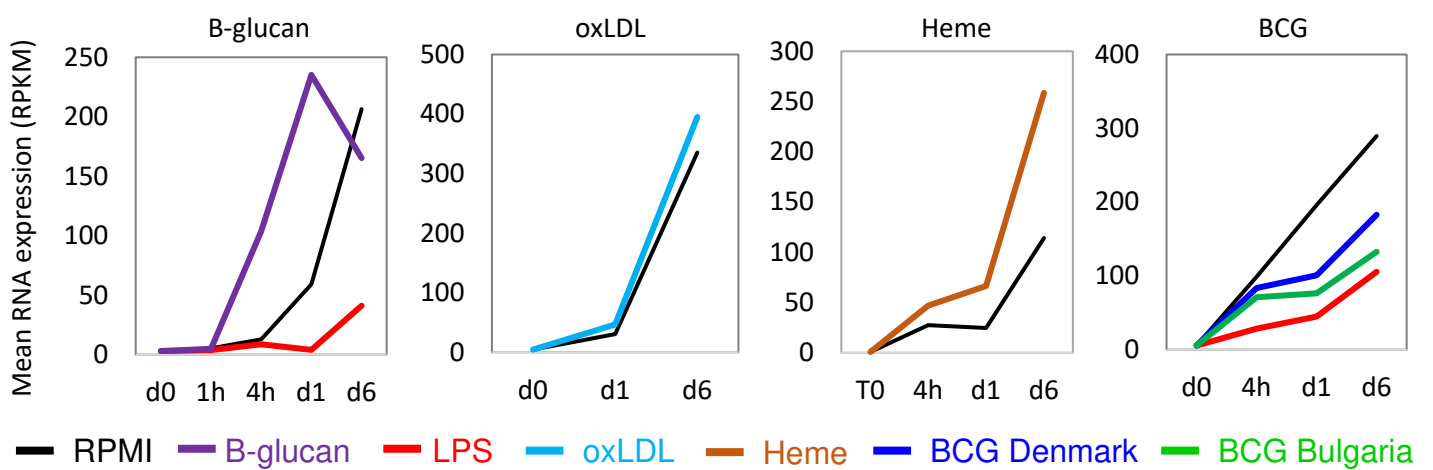

**Figure S2. Related to Figure 2. BCG induced Trained immunity involves a unique transcriptomic profile, unrelated to differentiation.** **A.** Dot plot of mean log<sub>2</sub> fold change relative to day 0 monocytes, based on monocyte-to-macrophage differentiation associated gene expression in each dataset (p.adj <0.05, FC >2.5, RPKM >5). **(i)** The first panel shows the current BCG experiment, based on 1,734 differentiation-associated Genes, with monocytes (triangle), day 1 RPMI (black circle) and day 6 RPMI macrophage (black square) distributed from left to right. BCG exposure shifts day 1 (blue and green circles) and day 6 (blue and green squares) expression profile towards the left, attenuating differentiation. **(ii)** B-glucan accelerates differentiation-associated gene expression, while LPS attenuates the process. Plot based on 839 genes. **(iii)** oxLDL accelerates the differentiation-associated gene expression at day 1 (light blue circle). Plot based on 1,428 genes. **B.** Expression of lipoprotein lipase (*LPL*) in monocytes over time exposed to B-glucan, LPS, Heme, oxLDL and BCG Denmark and BCG Bulgaria. *LPL* expression increases with differentiation, with TRIM stimuli accelerating the upregulation, except for BCG, which attenuates *LPL*.

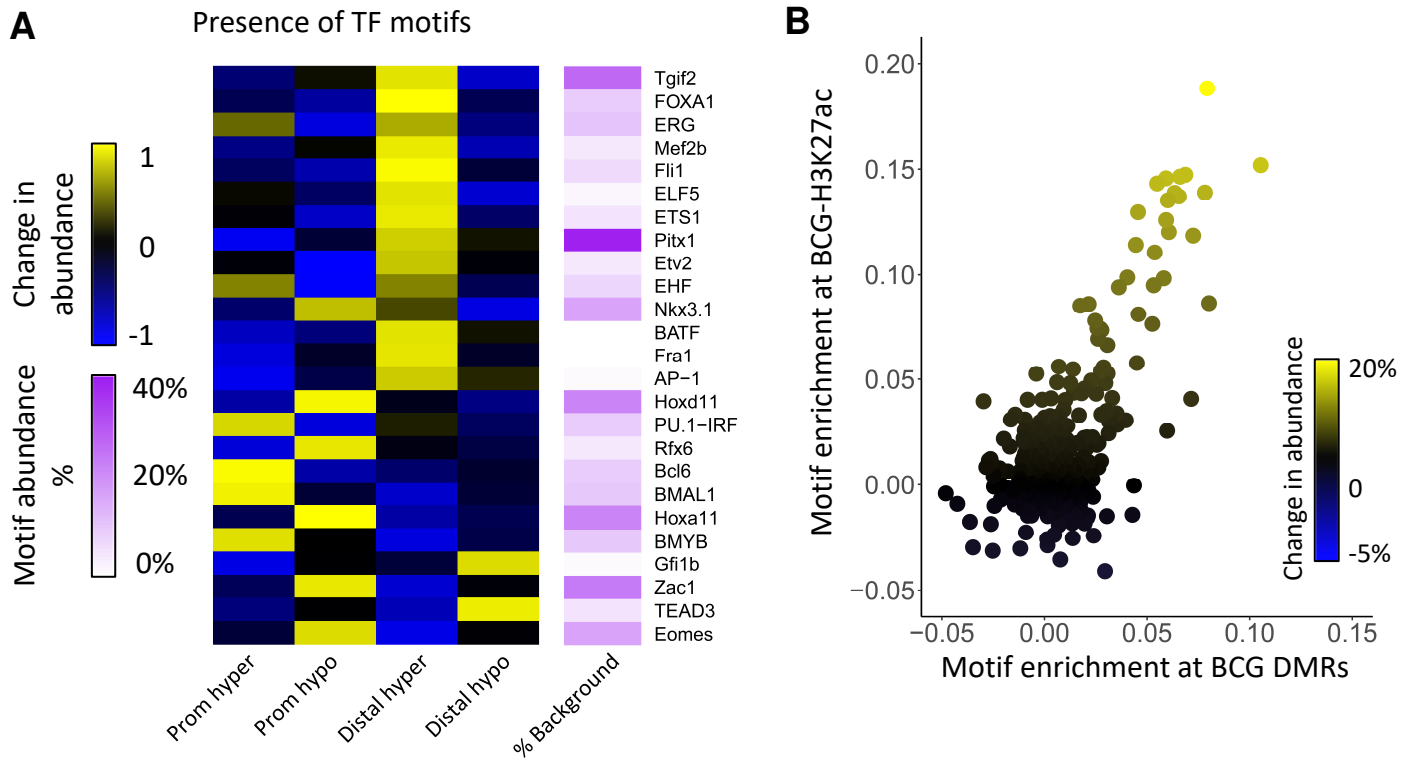

**C** FAS – trained by BCG for stronger transcription after re-stimulation

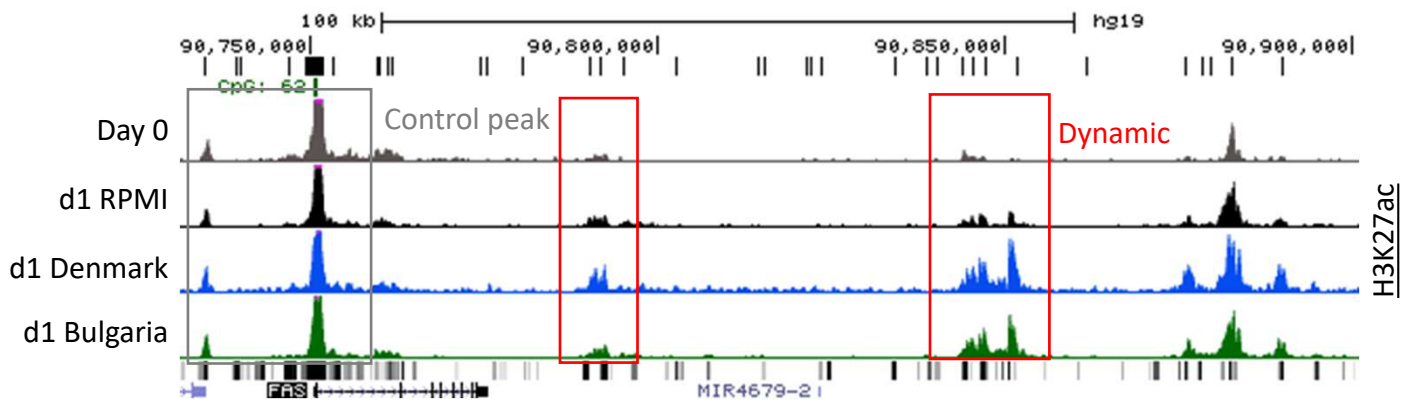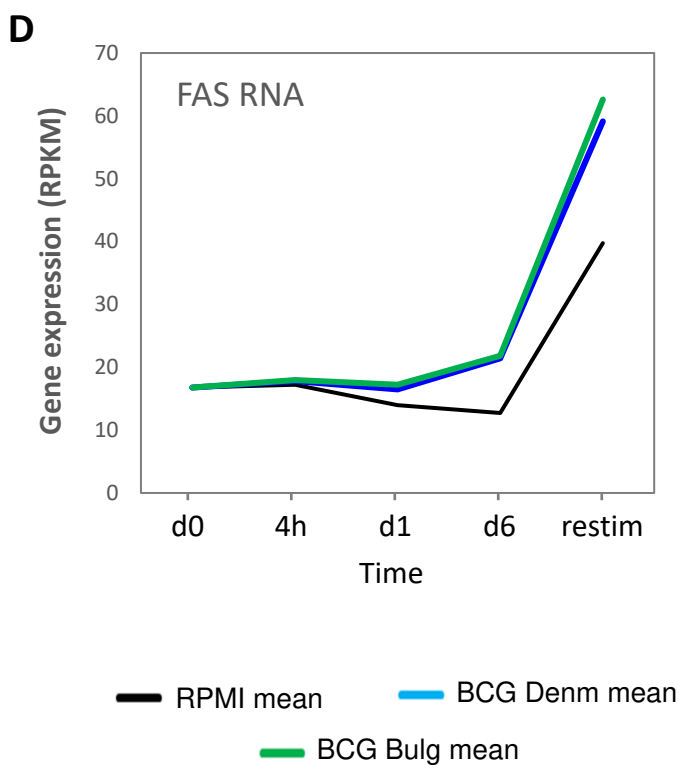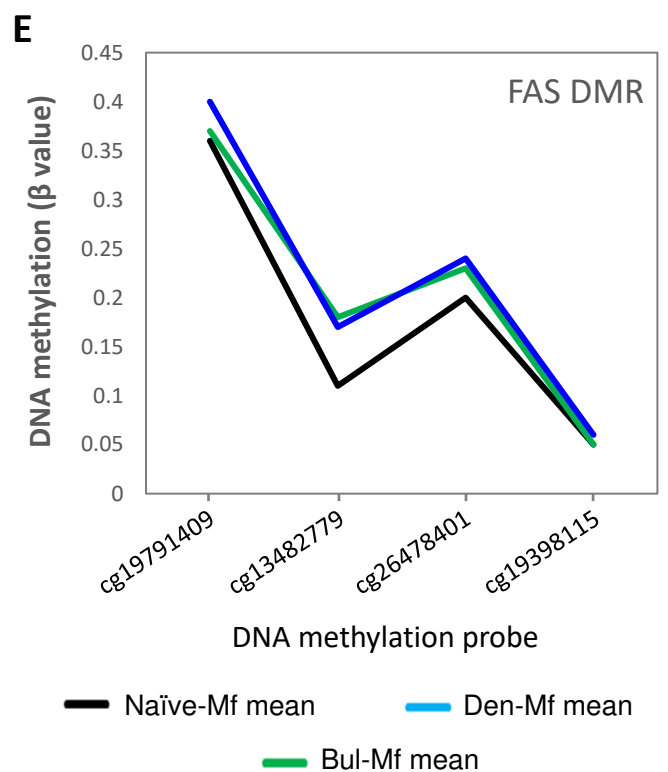

**Figure S3. Related to Figure 3. Coordinated remodelling of H3K27ac, DNA methylation and gene expression.** **A.** Motif scanning identified distinct differences between promoter and distal DMRs and those that show increased (hyper) methylation in response to BCG. **B.** Scatter plot showing high correlation between motif enrichment at BCG-Induced H3K27ac regions and BCG-associated DMRs. **C.** Map of *FAS* gene, which shows a trained LPS response in BCG-Mf, with H3K27ac signal tracks. Downstream distal elements show increase in H3K27ac signal 24 hours after BCG Denmark and BCG Bulgaria exposure. **D.** Differentially methylated region (DMR) near the *FAS* gene and **E.** Expression of *FAS* over time in RPMI or BCG exposed monocytes, showing a trained profile in BCG-Mf.

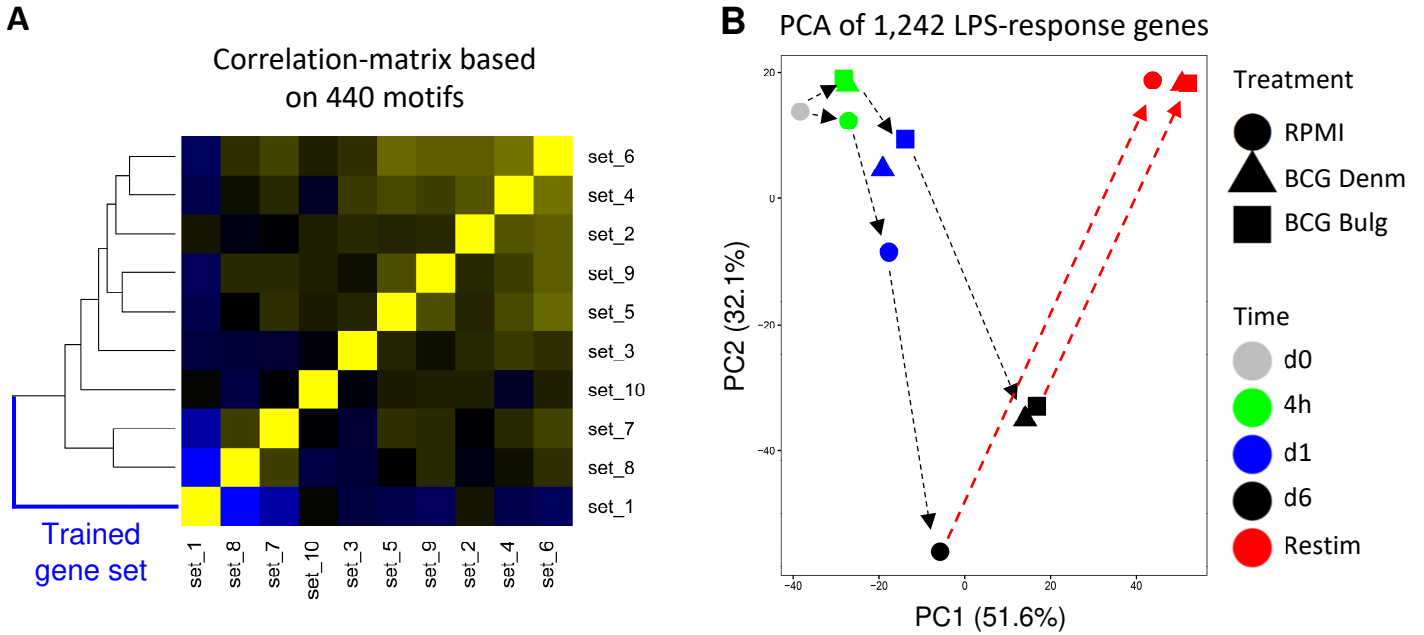

**C** Trained immunity-related TF motifs and gene expression

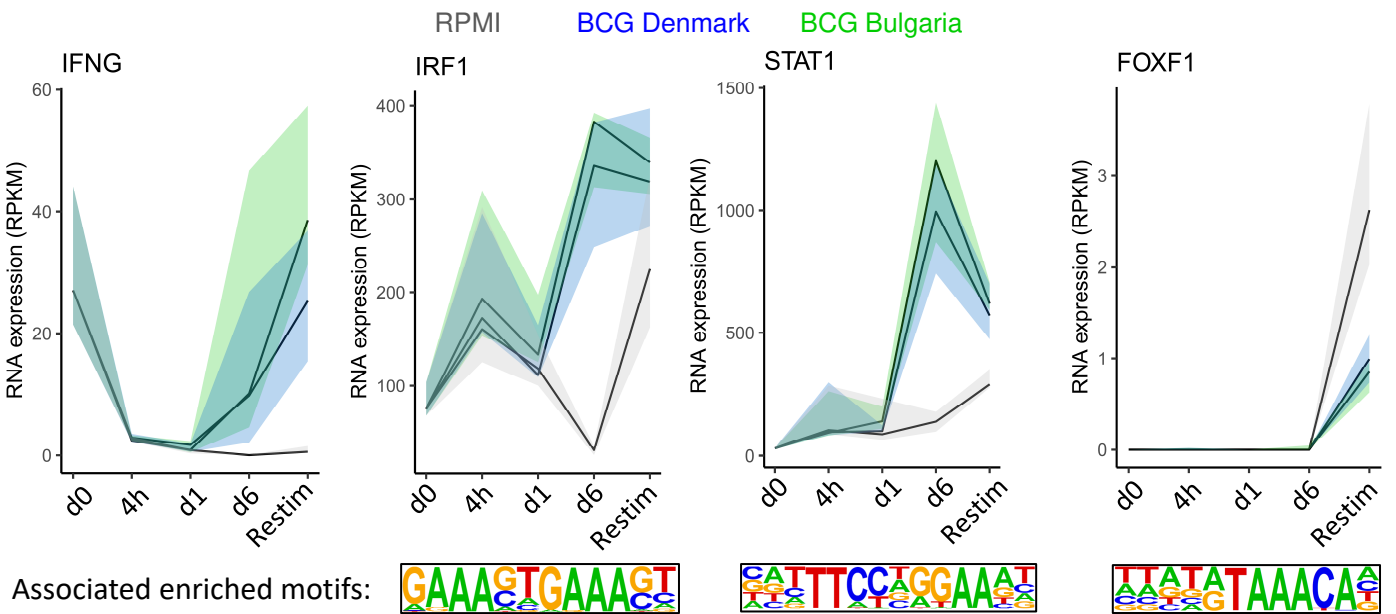

**D** Promoter H3K27ac level in BCG Den-Mf at day 6 correlates with a trained response to LPS restimulation

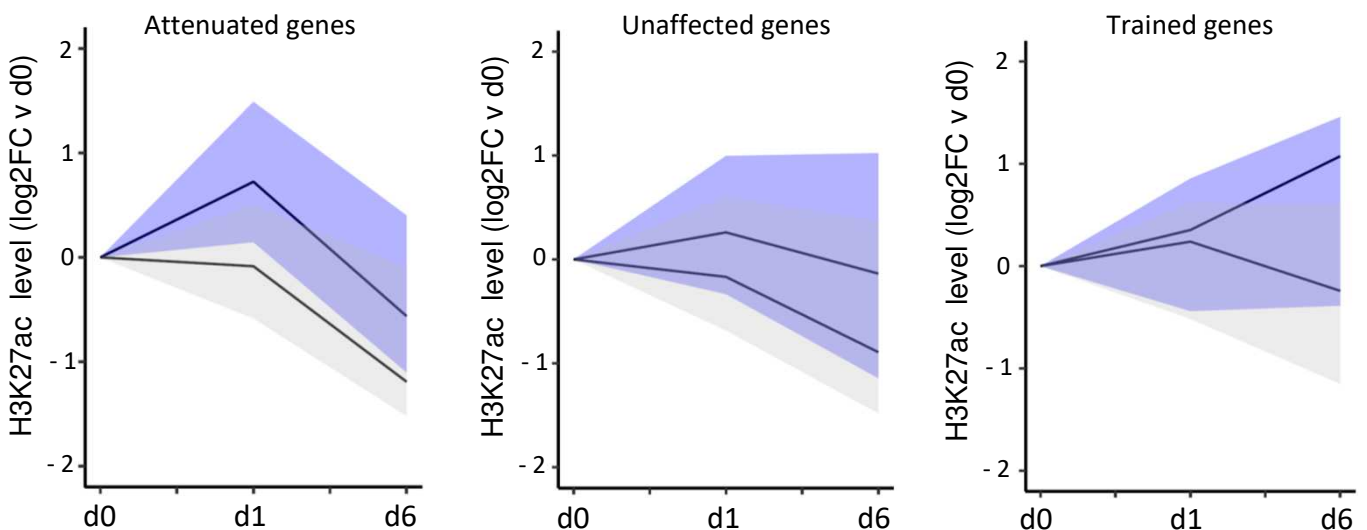



**Figure S4. Related to Figure 4. Transcription Factor motif signature associated with LPS restimulation in BCG-Mf.** **A.** Correlation matrix based on abundance of 440 TF motifs across gene sets induced by LPS at day 6. Genes were separated into 10 sets of 120 (out of total 1,242 genes in **Figure 4B**), with set\_1 showing a trained LPS response in BCG-Mf and set\_10 showing an attenuated LPS response in BCG-Mf. The trained gene set\_1 clustered away from others, indicating that this set of genes have a unique motif signature. **B.** PCA plot of RPMI and BCG exposed cells over time, based on 1,242 LPS responsive genes at day 6. BCG-Mf show a slightly inflamed expression profile. **C.** Expression of genes encoding TFs associated with trained gene promoter motifs (*IRF1* and *STAT1*), and *FOXF1*, which has an enriched motif at attenuated genes. In addition to upregulated *IRF1* in BCG-Mf compared to RPMI-Mf, these cells also show higher expression of IFN $\gamma$ . **D.** The 1,242 LPS responsive genes were separated into attenuated (100 genes), unaffected (946 genes) and trained (196 genes). Dynamic H3K27ac (10,329 peaks) within 5kb of the promoter region was plotted at these genes. At attenuated and unaffected gene promoters H3K27ac is elevated in BCG exposed monocytes at 24 hours. At trained genes, H3K27ac accumulates at day 6 in BCG-Mf. This indicates that the later H3K27ac accumulation (**Figure 3E**) is priming the trained transcriptional response to LPS restimulation in BCG-Mf.

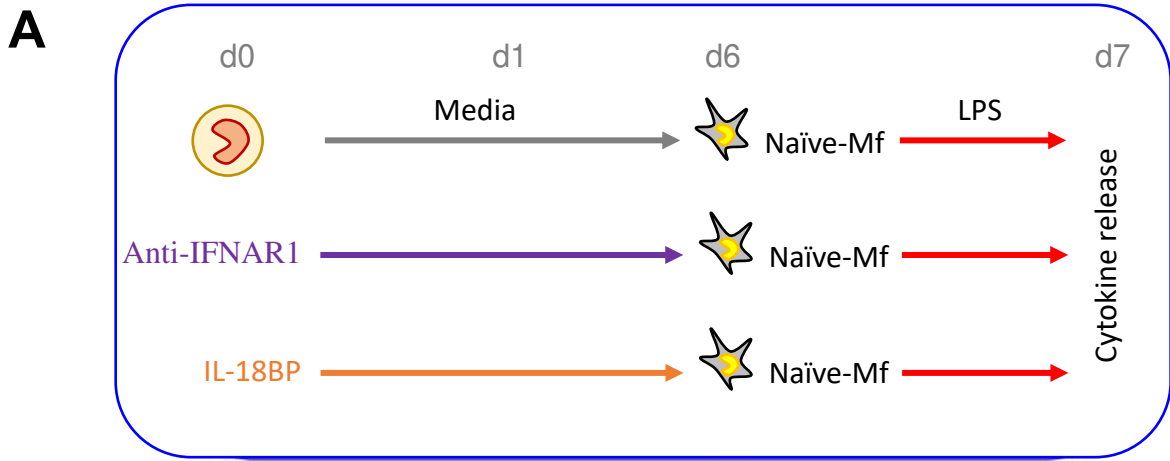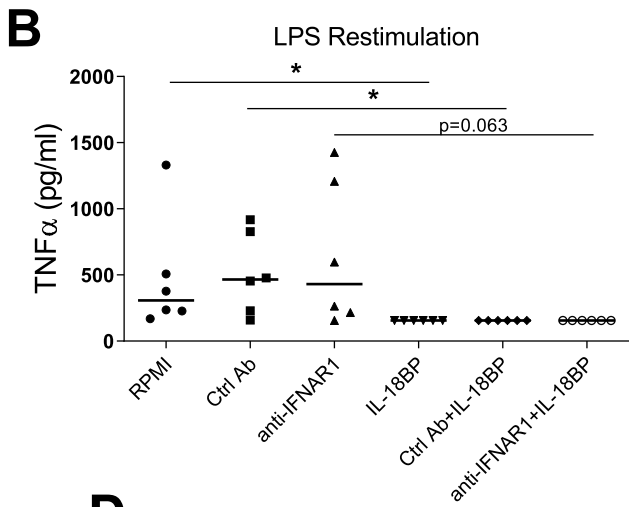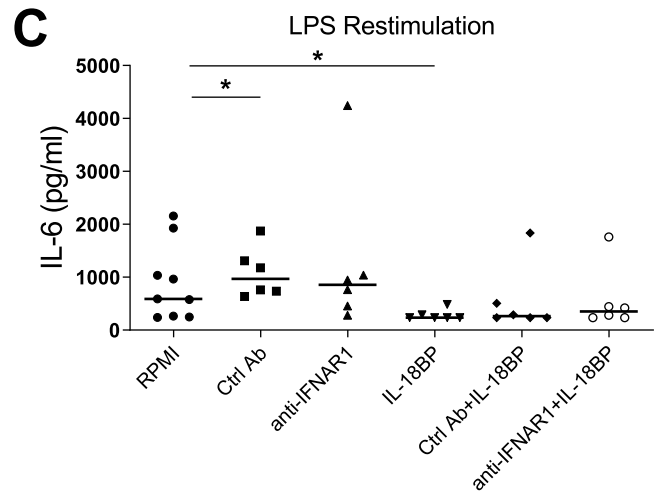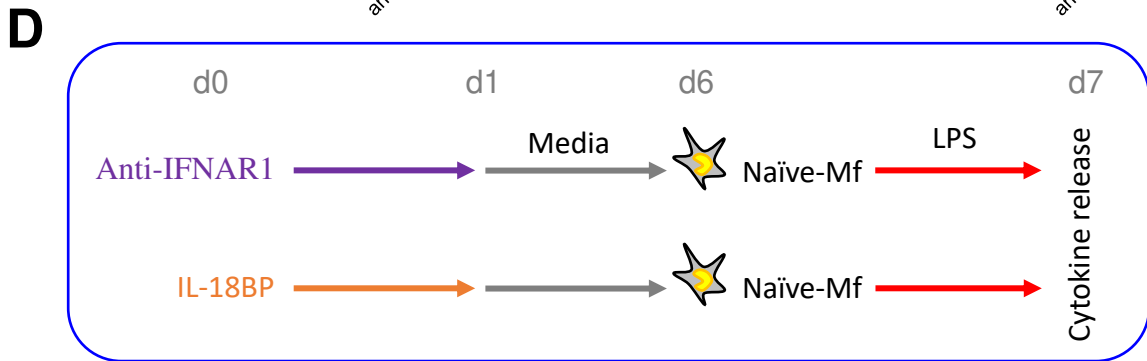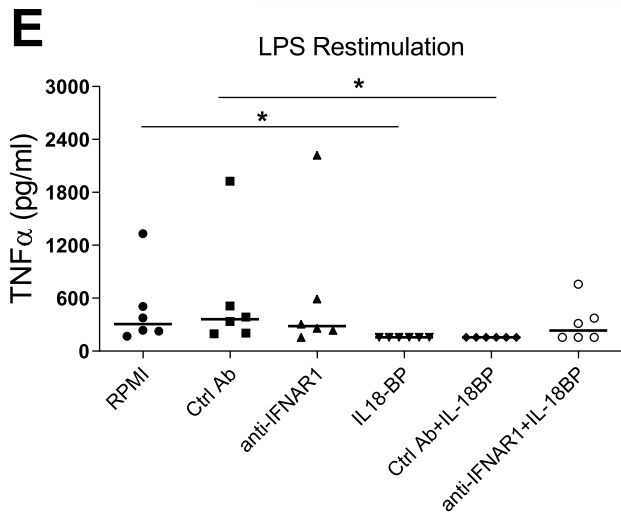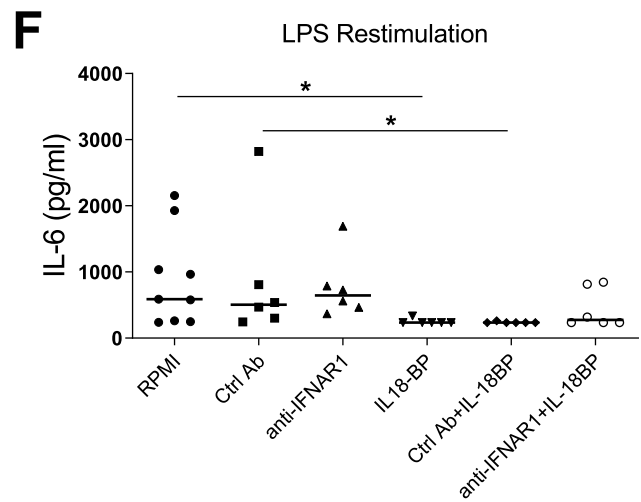

**Figure S5. (Related to Figure 5) A.** *In vitro* model to test the effect of IL-18BP and anti-IFNAR1 Ab on trained immunity. Monocytes exposed to anti-IFNAR1 Ab (purple line) and IL-18BP (orange line) were in the culture medium for the entire 6 days. At day 6, macrophages were exposed to LPS and cytokine release was measured 24 hours later (day 7). Dotplots showing cytokine release in pg/mL for **B.** TNF and **C.** IL6 at day 7 **D.** *In vitro* model of inhibitor co-stimulation for 24 hours only, followed by media for 5 days, before LPS restimulation. Dotplots showing cytokine release in pg/mL for **E.** TNF and **F.** IL6 production at day 7, 24 hours after LPS restimulation. n=6-9. \*p<0.05.

### A Monocyte proportions

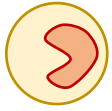

Total Monocytes

CD14<sup>+/+</sup>CD16<sup>+/+</sup>

Group comparison:  
 Classical (p = 0.29)  
 Non-classical (p = 0.24)  
 Intermediate (p = 0.98)

### B classical

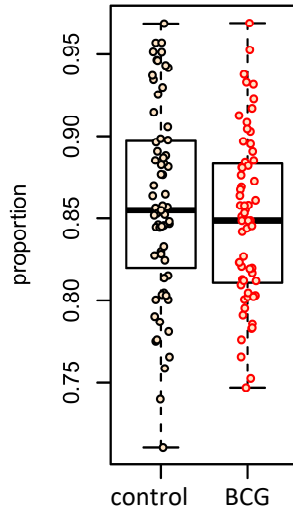

### non classical

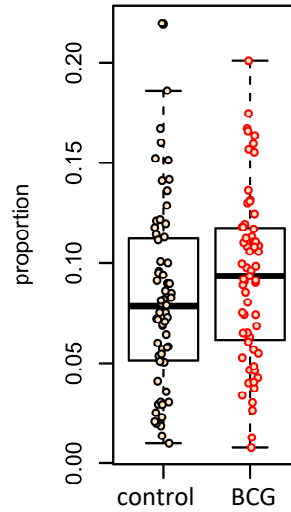

### intermediate

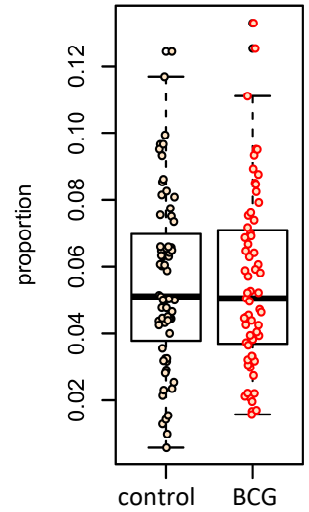

### C PCA loadings

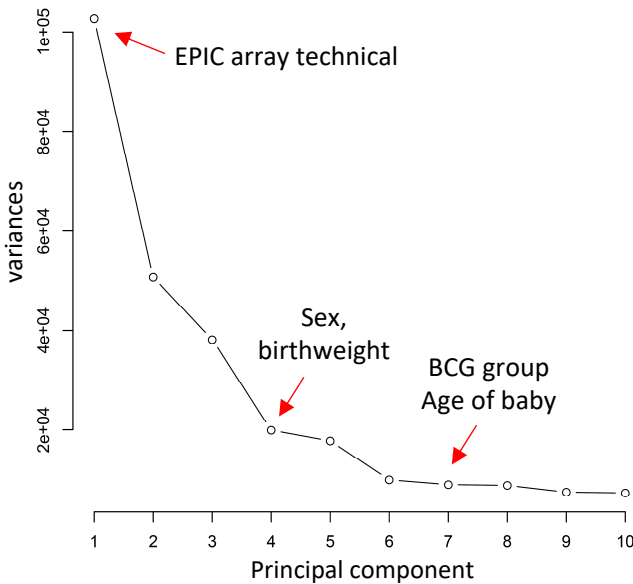

### D Traits in the final model

No-BCG vs BCG vaccinated

+

**Technical:**

Sentrix\_ID, Sample well, plate and position in array

+

**Biological confounders:**

Sex, mother's BCG status, birthweight, mode of delivery, mother's age, mother's smoking, ethnicity, gestational age, MMR vaccine, household smoking, breast-feeding duration, age of baby,

+

**Sample composition**

Classical, non-classical and intermediate monocyte proportions

### E 2,836 probes summary

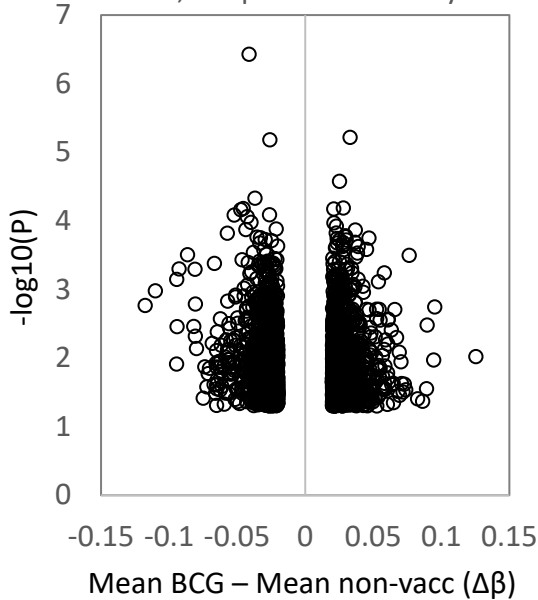

### F BCG at sex-probes

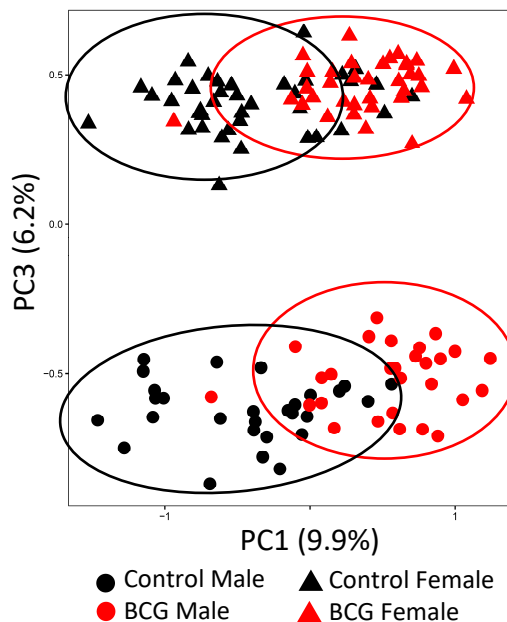

### G cg08846002

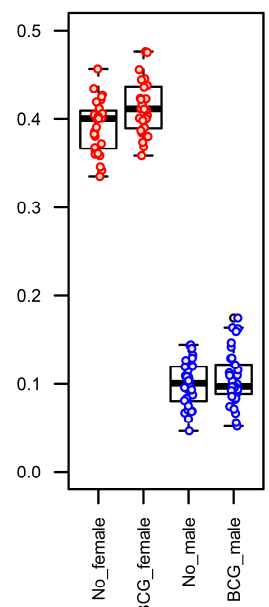

**Figure S6. Related to Figure 6. Summary of the statistical model used to identify BCG-associated DNA methylation signature.** **A.** P values for monocyte subtype proportions between the non-BCG-vaccinated and BCG-vaccinated groups, showing no difference. **B.** Boxplot of classical, intermediate, and non-classical monocyte proportions for individuals in non-BCG-vaccinated (black) and BCG-vaccinated (red) groups. **C.** PCA loadings, with primary contributors to variation for each principal component. **D.** Technical and biological co-variants included in the final statistical model. **E.** Volcano plot of 2,836 DMPs that were significant between non-BCG-vaccinated and BCG vaccinated groups ( $p < 0.05$ ,  $\text{dB} > 0.02$ ). **F.** BCG effect is seen on the X chromosome, with clear separation of BCG and non-BCG-vaccinated groups on PC1, and separation by sex on PC3. This plot was generated using the same probes as Figure 6B, which shows PC1 v PC2. **G.** Boxplot of a BCG-DMP on the X chromosome.

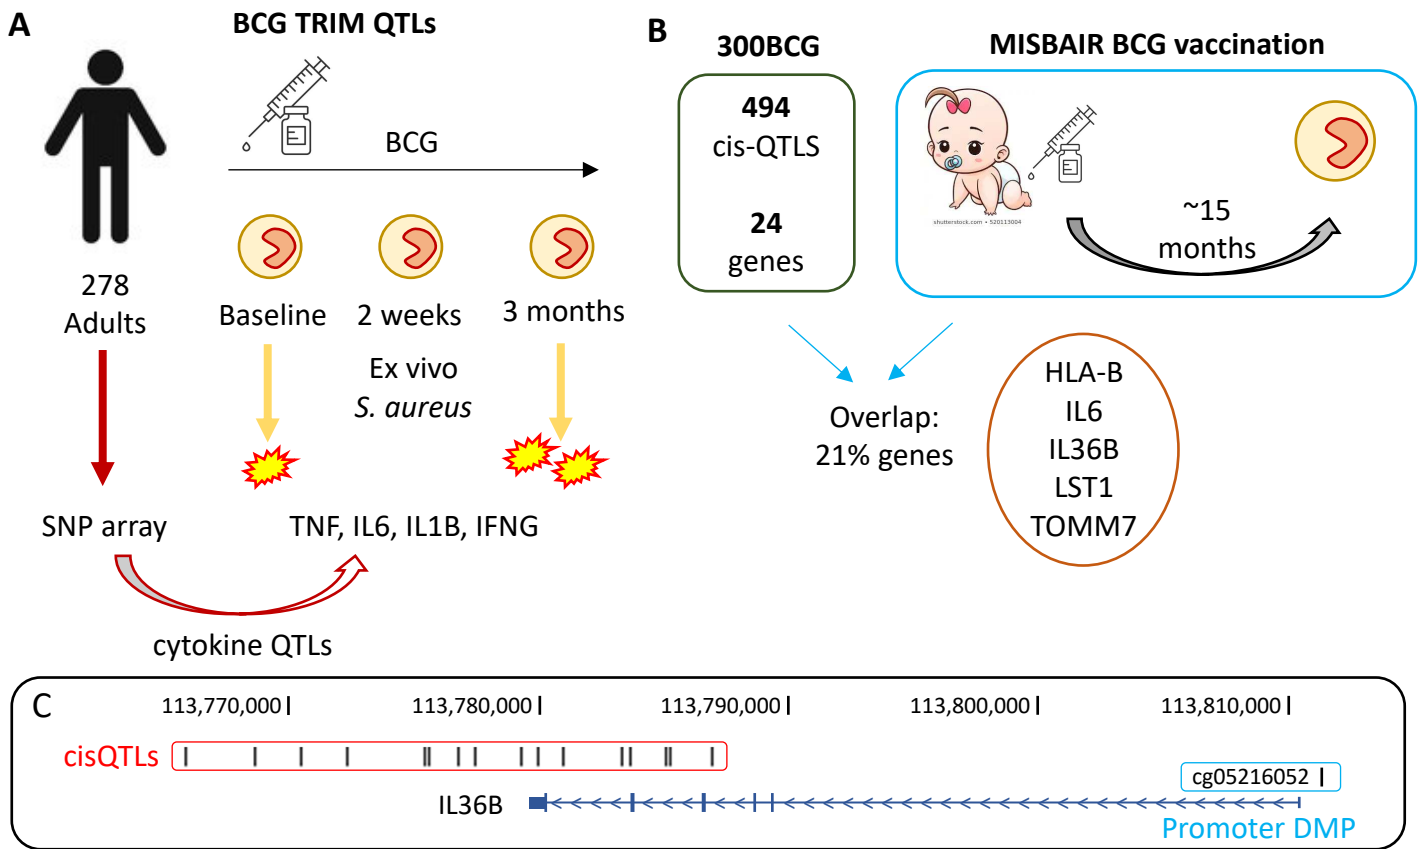

**Figure S7. Related to Figure 6. Overlap between cytokine QTLs upon BCG-induced TRIM and differential DNA methylation associated with BCG vaccination.** **A.** Model for identification of cytokine-release associated quantitative trait loci (cytokine-QTLs) in the 300BCG cohort. **B.** In total, 24 genes were associated with a cytokine-QTL in trans, of which 5 were also associated with a DMP in the MIS-BAIR dataset. **C.** Map of the *IL36B* gene, which has a BCG-associated DMP in the promoter region and several cis cytokine-QTLs at the 3' end.

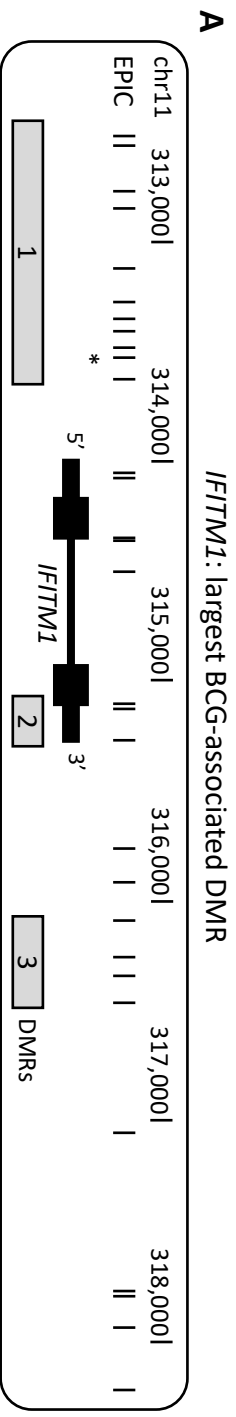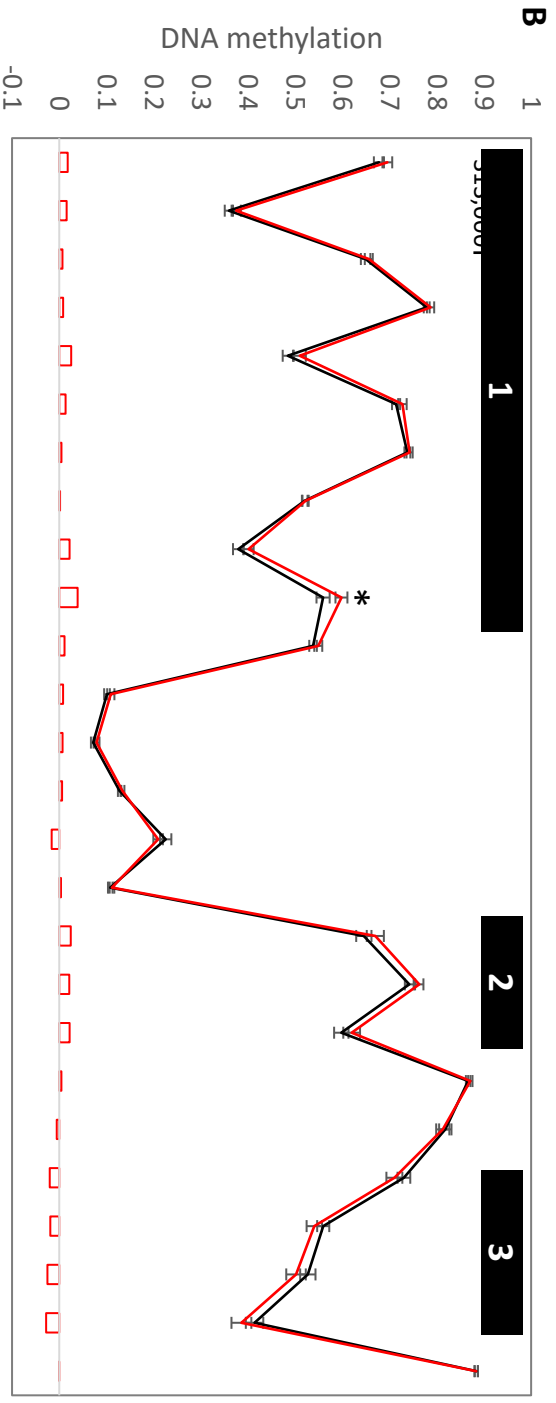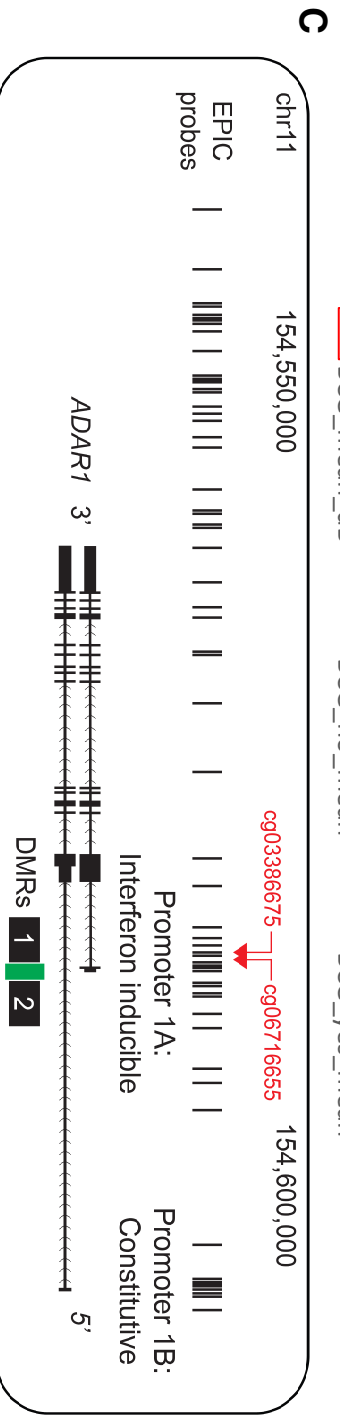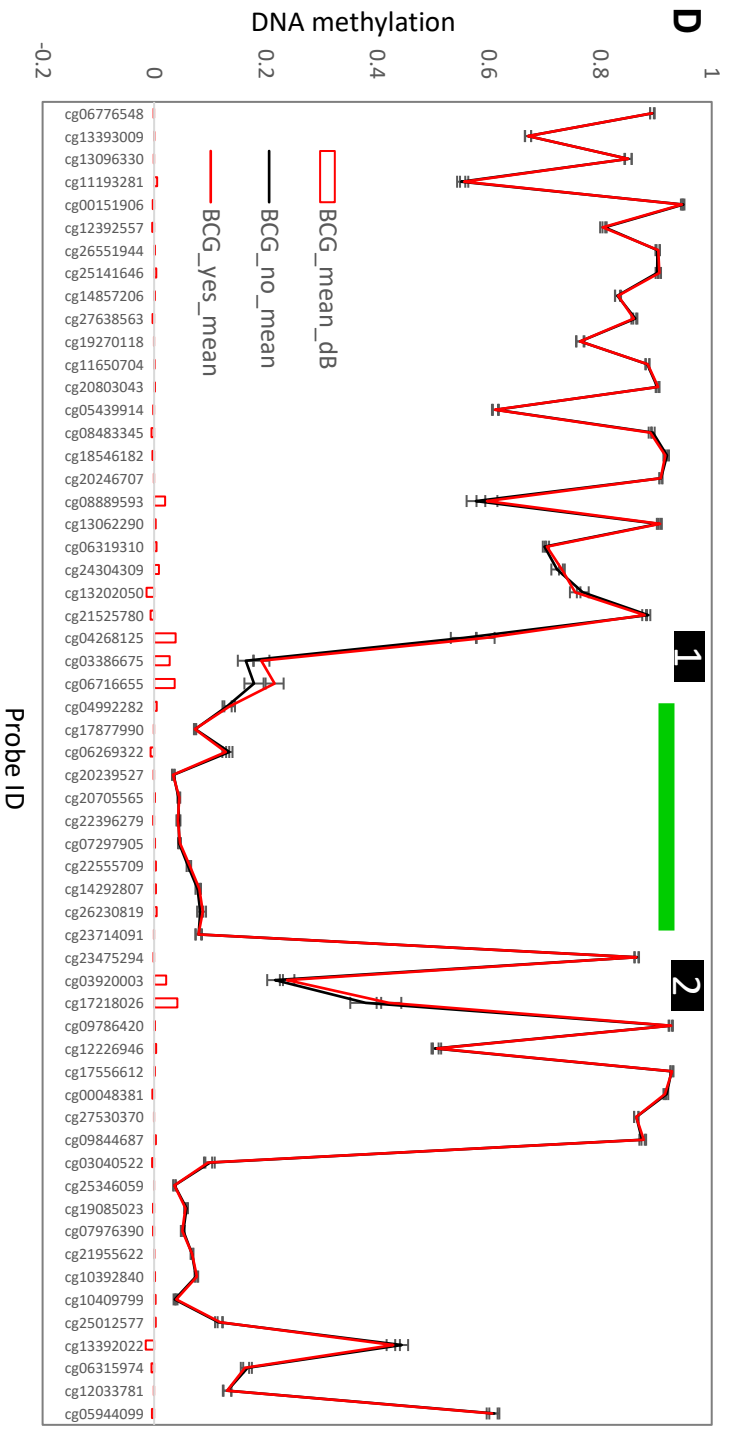



**Figure S8.** Related to Figure 7. **A.** Map of the *IFITM1* gene locus, showing three DMRs located upstream and downstream of the gene. **B.** DNA methylation is higher in the BCG group within DMR1 and lower in DMR2 and DMR3. **C.** Extended map of the *ADAR1* gene locus showing **D.** consistent DNA methylation across the *ADAR1* gene, except at two DMRs that occur at either side of a CpG Island, with higher methylation in the BCG-vaccinated group.

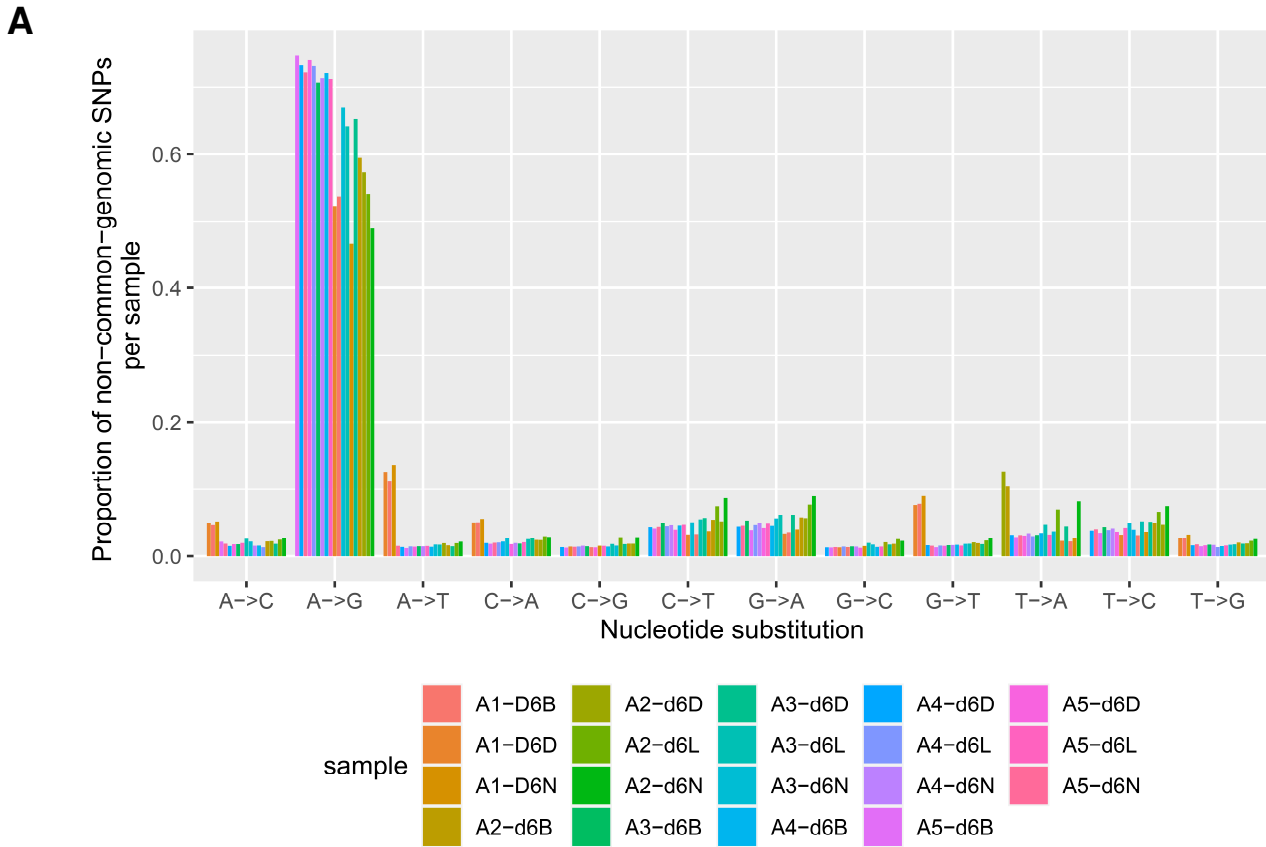

**B** 4k ALU sites transcribed in all samples and edited in  $\geq 3$  samples

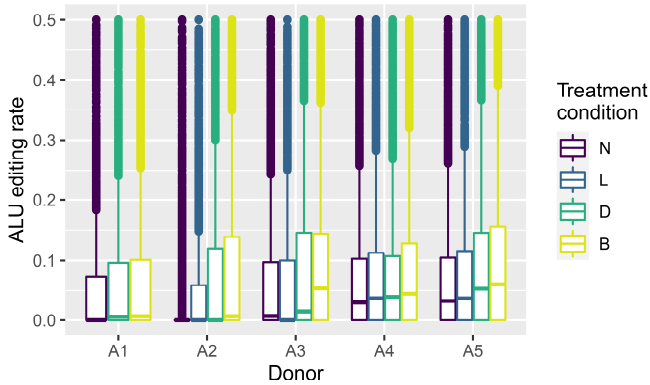

**C** 314 ALU sites edited in all 19 samples

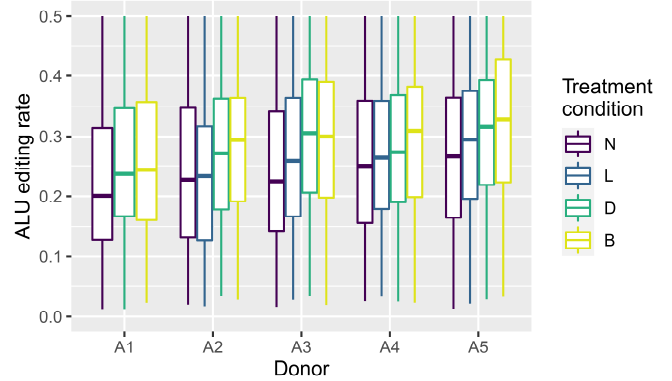

**D** ENSG00000243811 APOBEC3D

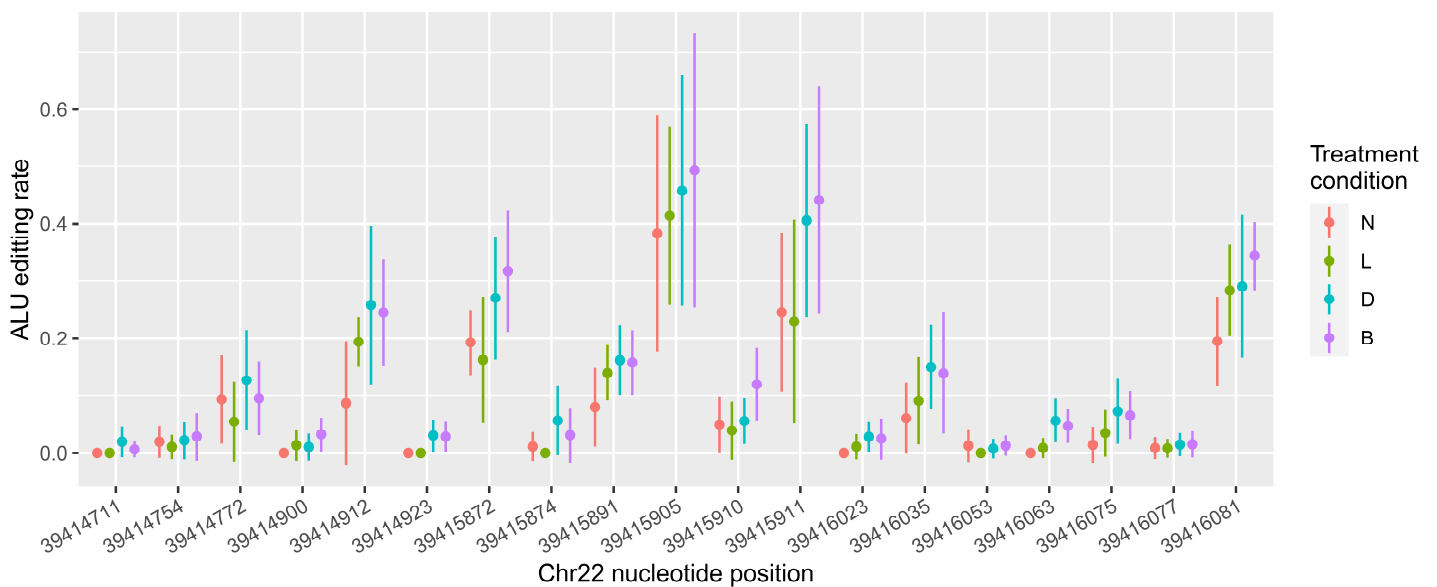

**Figure S9. Related to Figure 9. RNA editing in BCG exposed macrophages *in vitro*.** **A.** Bar plot showing that at non-common SNPs, there is an increase in A>G editing events compared to other combinations in all RNA-seq samples used for analysis. **B.** Boxplot showing proportion of A>G per donor at 4,000 Alu sites that are transcribed in all samples and edited in at least 3 samples. **C.** Boxplot showing proportion of A>G per donor at 314 Alu sites that are transcribed and edited in all samples. **D.** A>G editing events at specific loci within APOBEC3D.

# Supplementary Tables

- **Supplementary Table 1** Cytokine release in response to BCG and LPS restimulation in vitro
- **Supplementary Table 2** Gene expression difference between monocytes exposed to BCG Denmark and BCG Bulgaria
- **Supplementary Table 3** List of all dynamic genes in the in vitro BCG trained immunity model
- **Supplementary Table 4** Gene ontology terms and statistics for Figure 2C, 4D and 6C
- **Supplementary Table 5** List of genes induced by LPS restimulation in Naïve-Mf and BCG-Mf at day 6
- **Supplementary Table 6** List of MIS BAIR BCG-vaccination associated differentially methylated probes (DMPs)
- **Supplementary Table 7** List of cisQTLs that influence BCG trained *S. aureus* response in the 300BCG cohort
- **Supplementary Table 8** List of MIS BAIR BCG-vaccination associated differentially methylated regions (DMRs)
